# Supplementary material for: Engineering Alginate-Based Dry Powder Microparticles to a Size Suitable for the Direct Pulmonary Delivery of Antibiotics
Source: MDPI journal article supplement (doi:10.3390/pharmaceutics14122763), 2022-12-09
Supplement: s1 [file s1]

# Supplementary Materials: Engineering alginate-based dry powder microparticles to a size suitable for direct pulmonary delivery of antibiotics

Beatriz Arauzo, Álvaro González-Garcinuño, Antonio Tabernero, Javier Calzada-Funes, María Pilar Lobera, Eva M. Martín del Valle, Jesús Santamaria

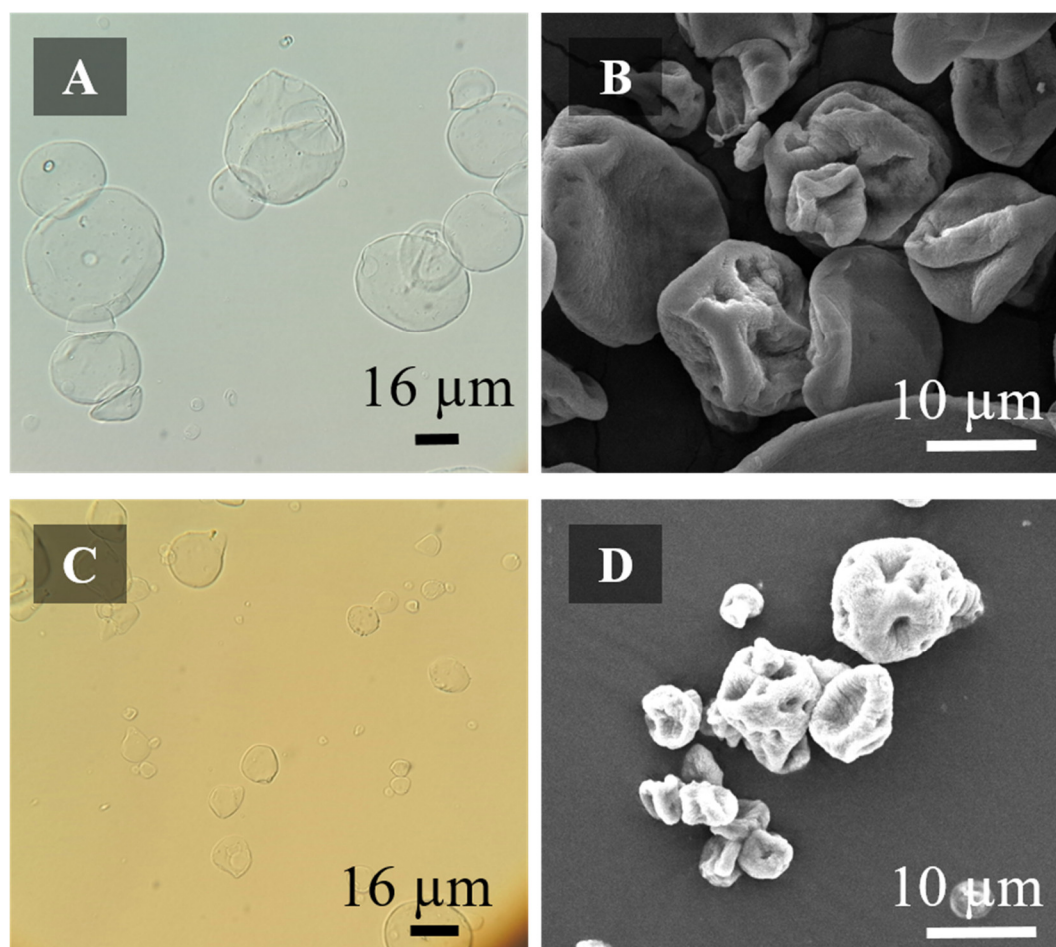

**Figure S1.** Optical and SEM microscopes images of alginate microparticles; (A - B) Alginate 2% w/v; (C - D) Alginate 2.5% w/v.

**Table S1.** Size of alginate microparticles.

| Samples               | Optical microscope ( $\mu\text{m}$ )<br>(in water) | SEM ( $\mu\text{m}$ )<br>(as powder) |
|-----------------------|----------------------------------------------------|--------------------------------------|
| Alginate 2% w/v MPs   | $36.10 \pm 14.50$                                  | $11.53 \pm 5.02$                     |
| Alginate 2.5% w/v MPs | $16.70 \pm 7.90$                                   | $7.57 \pm 4.18$                      |

**Table S2.** EDX analysis.

| Element | Raw Colistin |         | Alginate Microparticles |         |
|---------|--------------|---------|-------------------------|---------|
|         | Weight%      | Atomic% | Weight%                 | Atomic% |
| C K     | 44.03        | 54.18   | 78.92                   | 82.58   |
| N K     | 18.32        | 19.33   | 7.76                    | 6.96    |
| O K     | 19.74        | 18.24   | 13.32                   | 10.47   |
| S K     | 17.90        | 8.25    | -                       | -       |
| Ba L    | -            | -       | -                       | -       |
| Total   | 100.00       |         | 100.00                  |         |

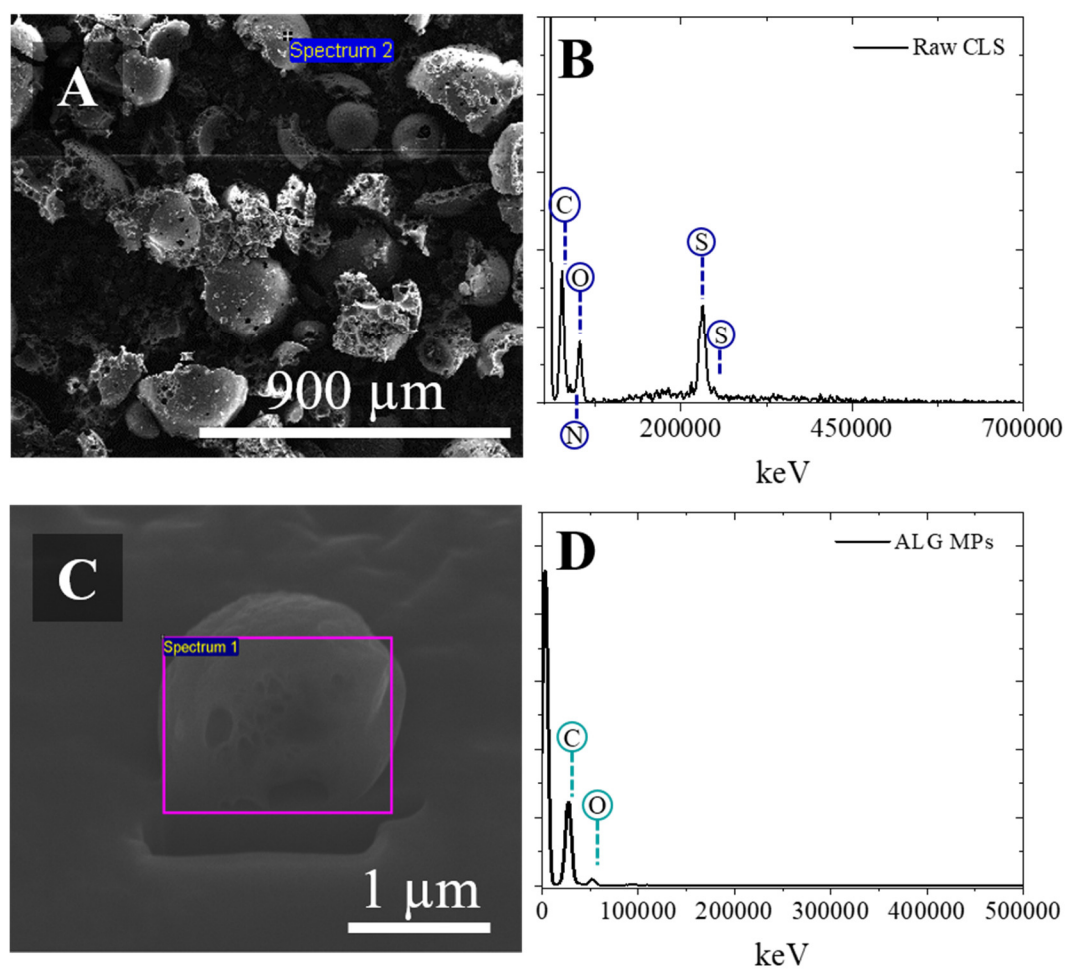**Figure S2.** EDX analysis. SEM and Dual-Beam images and spectrums: (A) Raw colistin sulfate; (B) EDX of raw colistin sulfate; (C) Alginate microparticles; (D) EDX of alginate microparticles.

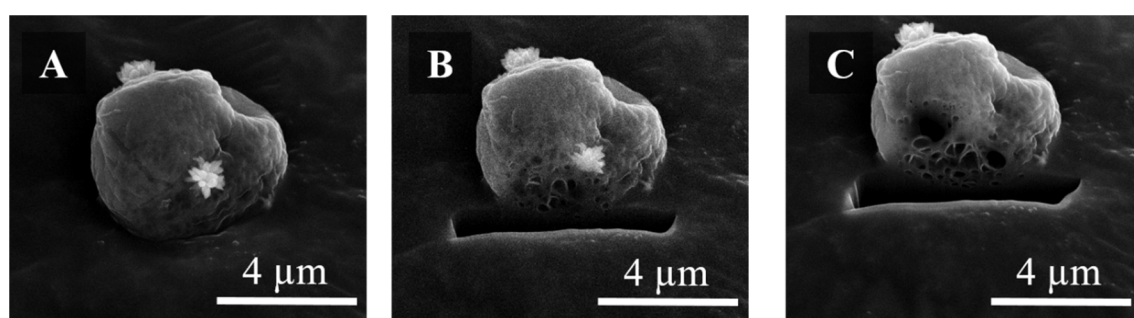

**Figure S3.** Alginate microparticles with colistin sulfate images from Dual-Beam microscope: **(A)** Initial ALG@CLS MPs; **(B - C)** Internal structure of microparticles after two cuts.

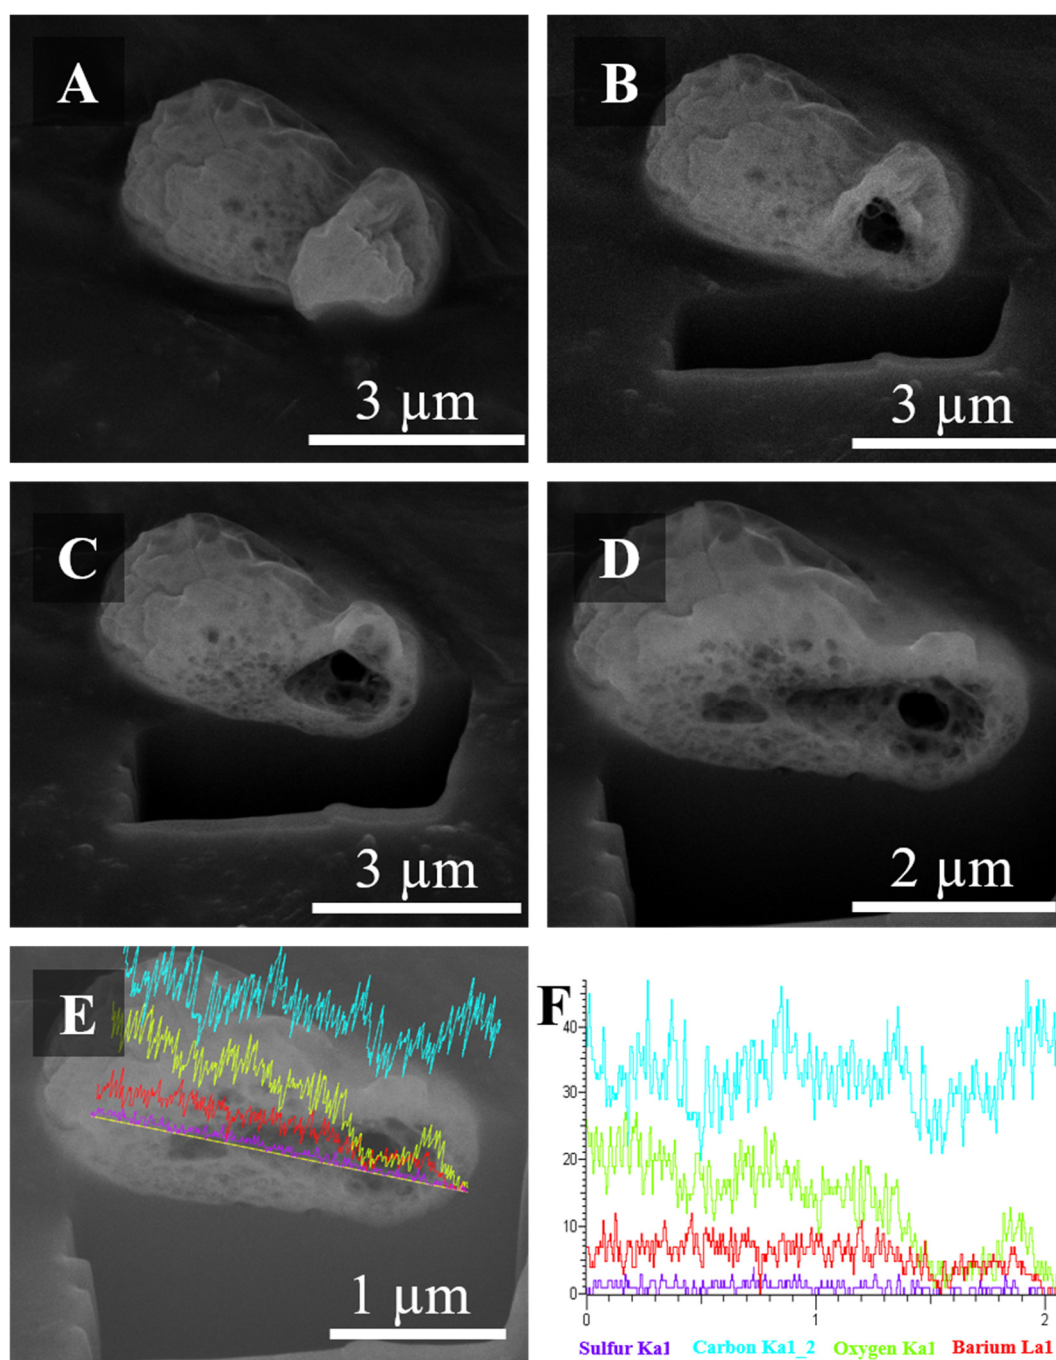

**Figure S4.** Alginate microparticles without drug, images from Dual-Beam microscope: (A) Initial alginate microparticle; (B - D) Internal structure of microparticles after three cuts; (E - F) Internal analysis composition of microparticle (oxygen, carbon, barium and sulfur).

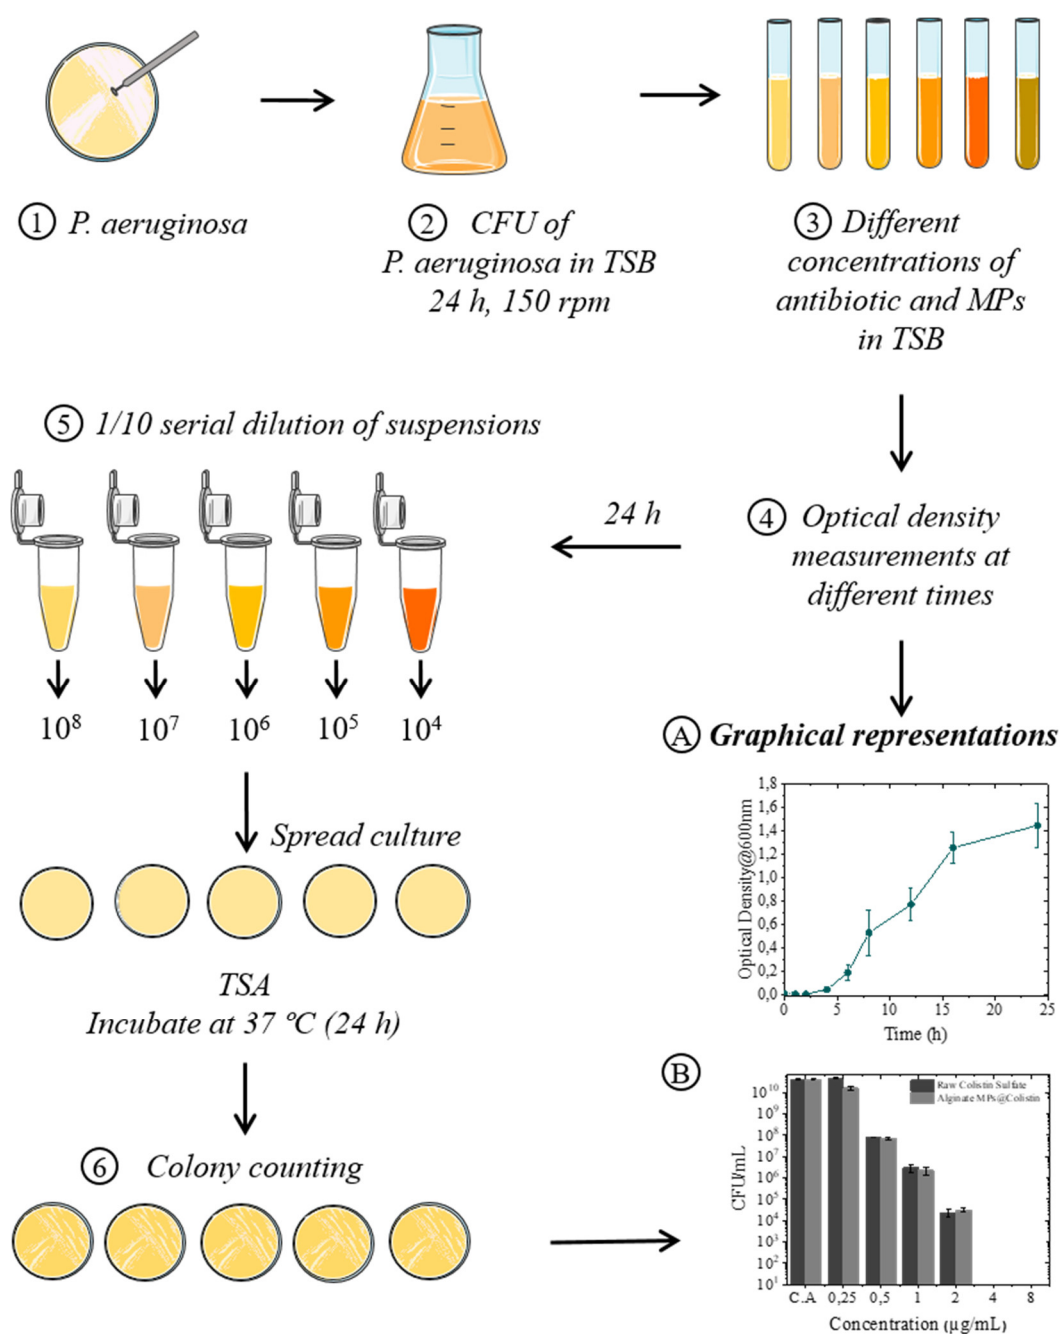

**Figure S5.** Protocol to determinate MIC and MBC concentrations of colistin sulfate against *P. aeruginosa*.
